# Supplementary material for: Evaluation of Gallium Citrate Formulations against a Multidrug-Resistant Strain of Klebsiella pneumoniae in a Murine Wound Model of Infection
Source: PubMed Central journal article supplement — Antimicrob Agents Chemother. 2015 Sep 18;59(10):6484–93. doi: 10.1128/AAC.00882-15 (PMC4576086; doi:10.1128/aac.00882-15), 2015-09-18
Supplement: AAC.00882-15_zac010154473so1.pdf [file AAC.00882-15_zac010154473so1.pdf]

## Supplemental Material

**Table S1** - MIC determination of gallium citrate against multiple bacterial species

| Bacteria                                                                    | Number of Strains | MIC* (ug/mL)           | MIC range (ug/mL) | MIC* (ug/mL)      | MIC range (ug/mL) | MIC* (ug/mL)      | MIC range (ug/mL) |
|-----------------------------------------------------------------------------|-------------------|------------------------|-------------------|-------------------|-------------------|-------------------|-------------------|
| <b>Gram Negative</b>                                                        |                   | <b>Gallium Citrate</b> |                   | <b>Tobramycin</b> |                   | <b>Aztreonam</b>  |                   |
| <i>P. aeruginosa</i>                                                        | 160               | 0.5                    | 0.12 - 8          | 4                 | 1 - 256           | 2                 | 1 - 64            |
| <i>Klebsiella pneumonia</i><br>(20 ESBL strains)                            | 31                | 0.5                    | 0.03 - 2          | >8                | 1 - >256          | 16                | <0.03 - >256      |
| <i>K. pneumonia</i><br>NDM-1 strain**                                       | 1                 | -                      | 0.125             | -                 | >256              | -                 | 64                |
| <i>E. coli</i><br>(17 ESBL strains)                                         | 29                | 8                      | <0.025 - 32       | >8                | 1 - >32           | 2                 | <0.03 - 32        |
| <i>Stenotrophomonas maltophilia</i>                                         | 10                | 0.5                    | 0.25-1            | 16                | 4 - >32           | 32                | 4 - >32           |
| <i>Acinetobacter baumannii</i><br>(Includes 30 multidrug resistant strains) | 40                | 8                      | 0.02 - 32         | -                 | -                 | -                 | -                 |
| <i>Burkholderia cepacia</i> &<br><i>cenocepacia</i>                         | 15                | 8                      | 1-32              | >32               | 0.25 - >32        | >32               | 64 - >256         |
| <b>Gram Positive</b>                                                        |                   | <b>Gallium Citrate</b> |                   | <b>Tobramycin</b> |                   | <b>Vancomycin</b> |                   |
| <i>Streptococcus pneumoniae</i>                                             | 10                | 32                     | 4-64              | 16                | 4 - 32            | -                 | -                 |
| <i>MRSA &amp; MSSA</i>                                                      | 24                | 16                     | 4 - >32           | 16                | 0.25 - >32        | <0.25             | <0.25-0.5         |

\*Values are mean MIC, where >10 strains were tested, the MIC values are MIC<sub>50</sub>  
\*\*New Delhi metallo-beta-lactamase (NDM-1) *K. pneumonia* strain from the ATCC® BAA-2146™  
All MIC testing was performed in iron-deficient BM-2 broth media

**Table S2** - Antibiogram of KP4640 was determined using the Phoenix (Becton, Dickinson and Co., Franklin Lakes, NJ) automated system according to the manufacturer's instructions. STS is an acronym for sterile tissue site. Strain is considered sensitive (S), resistant (R) or intermediate (I) to each given antibiotic.

| <b>Strain</b> | <b>Isolation site</b> | <b>Antibiotic</b>       | <b>MIC (µg/mL)</b> | <b>Sensitivity</b> |
|---------------|-----------------------|-------------------------|--------------------|--------------------|
| 4640          | STS                   | Amikacin                | ≤8                 | S                  |
| 4640          | STS                   | Amoxicillin-Clavulanate | >16/8              | R                  |
| 4640          | STS                   | Ampicillin              | >16                | R                  |
| 4640          | STS                   | Ampicillin-Sulbactam    | >16/8              | R                  |
| 4640          | STS                   | Aztreonam               | >16                | R                  |
| 4640          | STS                   | Cefazolin               | >16                | R                  |
| 4640          | STS                   | Cefepime                | >16                | R                  |
| 4640          | STS                   | Ceftazidime             | >16                | R                  |
| 4640          | STS                   | Ceftriaxone             | >32                | R                  |
| 4640          | STS                   | Ciprofloxacin           | >2                 | R                  |
| 4640          | STS                   | Ertapenem               | >4                 | R                  |
| 4640          | STS                   | Gentamicin              | >8                 | R                  |
| 4640          | STS                   | Imipenem                | 8                  | I                  |
| 4640          | STS                   | Levofloxacin            | >4                 | R                  |
| 4640          | STS                   | Moxifloxacin            | >4                 | R                  |
| 4640          | STS                   | Nitrofurantoin          | >64                | R                  |
| 4640          | STS                   | Piperacillin-Tazobactam | >64/4              | R                  |
| 4640          | STS                   | Tetracycline            | 4                  | S                  |
| 4640          | STS                   | Tobramycin              | >8                 | R                  |

**Figure S1**

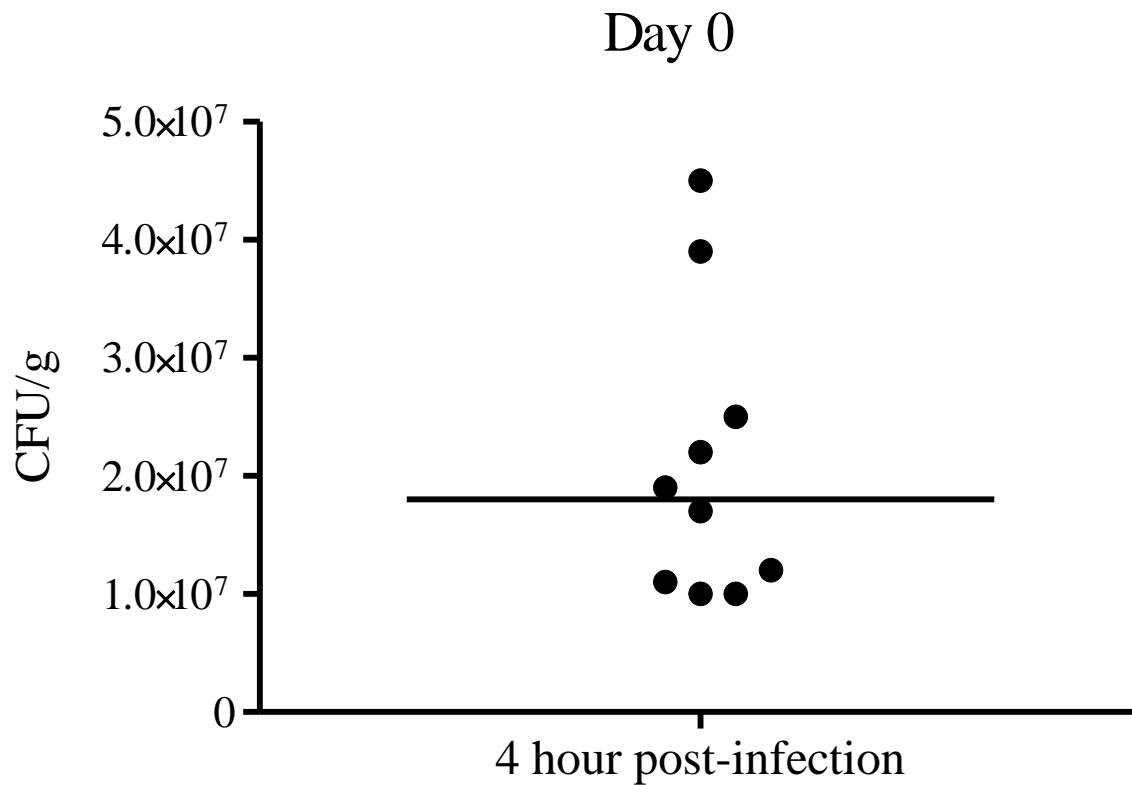

**Figure S1 - Bacterial burden in the whole bed at 4 hours post-inoculation**

Bacterial burden of KP4640 in the entire wound bed (not just 4 mm<sup>2</sup> punch biopsy) of mice was measured at 4 hours post-inoculation. Individual mice are represented by black dots. The mean is represented by the horizontal line. The results are from two biological replicates of 5 mice each.

**Figure S2**

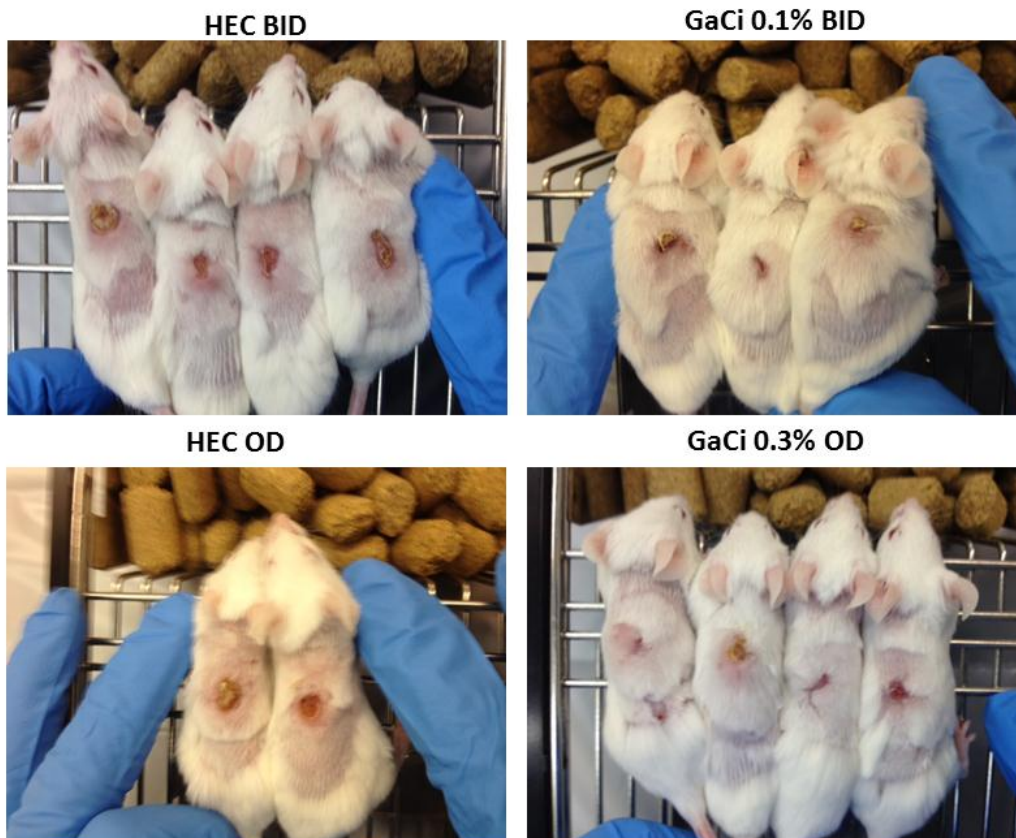

**Figure S2 – Day 20 Gross Pathology**

Photographs of gross pathology of full-thickness wound over time in representative BALB/c mice. Panels show full dorsal wounds on Day 20. These images are representative of treated animals with HEC BID or OD (negative controls) or HEC with GaCi 0.1% BID or GaCi 0.3% OD from two separate experiments with 12 mice per group.

**Figure S3**

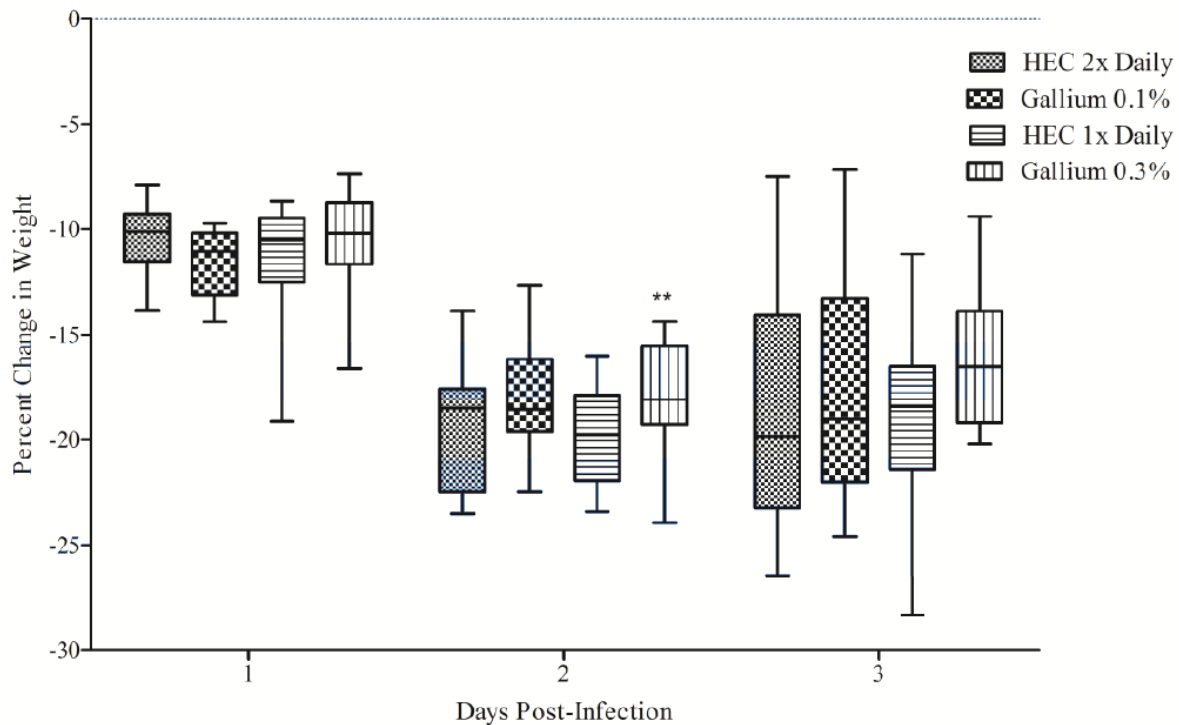

**2.5**

**Figure S3 - Weight change**

Box and Whisker plots of percent weight change on days 1 through 3 post-inoculum. Boxes show median and interquartile ranges, while whiskers represent 95% CI. Groups were compared each day via Mann-Whitney U-test; \*\* represent  $p$ -value of 0.01. These data are pooled from three separate experiments with 12 mice per group, 48 mice per test condition. Mice were treated with HEC alone OD or HEC + GaCi at 0.3% OD for 3 days, or mice were treated with HEC alone BID or HEC + GaCi at 0.1% BID for 3 days.

**Figure S4**

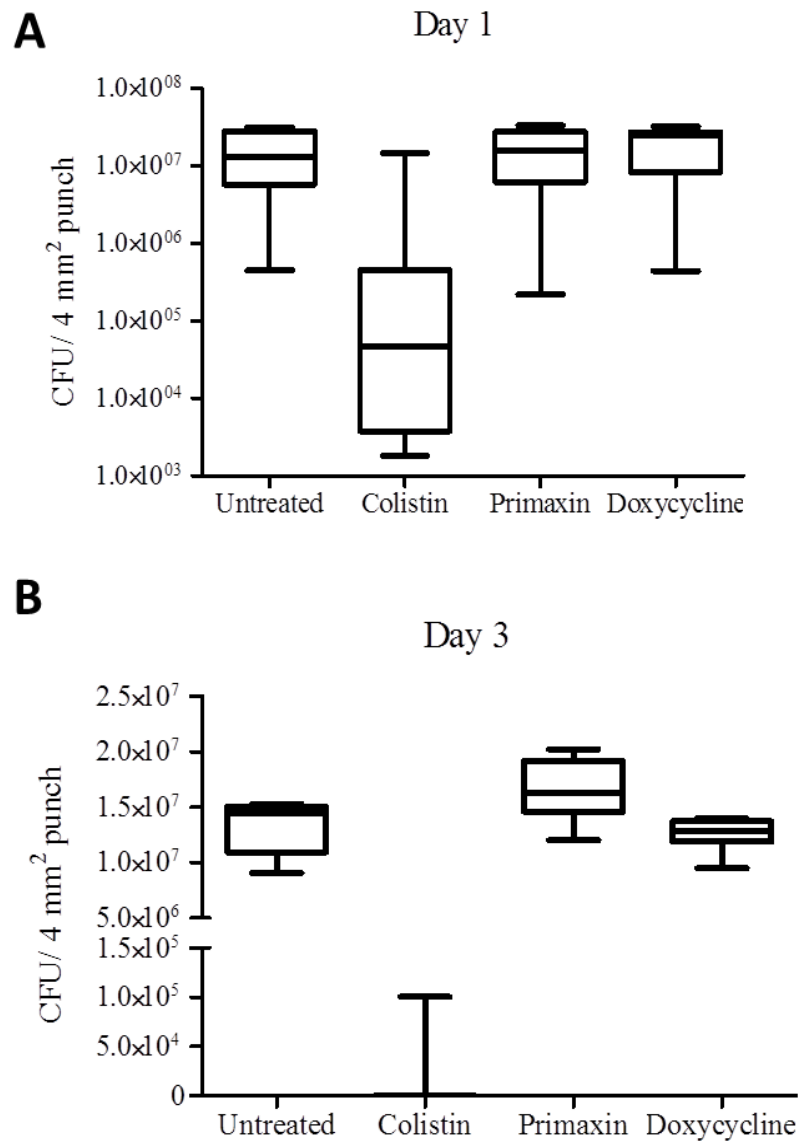

**Figure S4 - Comparison of antibiotic treatment of KP4640-infected mice in the murine wound model of infection**

Balb/C mice (two groups (biological replicates) of five mice, 10 mice total) were infected with  $5.0 \times 10^5$  CFU on day 0. At four hours, mice were given colistin (2.5 mg/kg) topically, Primaxin™ (2.5 mg/kg) via IP injection, or doxycycline (25 mg/kg) via IP

injection. Subsequently, mice were treated with the same doses BID for the next three days. On day 1 (A) or day 3 (B), mice were sacrificed and 4 mm<sup>2</sup> punch of tissue was removed from the wound bed and the bacterial burden was calculated. The colistin results on Day 1 and Day 3 are statistically significant when compared to untreated via the Mann Whitney t-test. On Day 3, the colistin CFU are also statistically significant when compared to all of the other tested groups via Kruskal Wallis (ANOVA) test followed by Dunn's Multiple Comparisons.
